# Supplementary material for: Mismatch repair gene defects in sporadic colorectal cancer enhance immune surveillance
Source: PubMed Central journal article supplement (PMC4791244; doi:10.18632/oncotarget.6179), 2015-10-19
Supplement: oncotarget-06-43472-s001.pdf [file oncotarget-06-43472-s001.pdf]

## Mismatch repair gene defects in sporadic colorectal cancer enhance immune surveillance

### Supplementary Material

**Supplementary Table 1.** Features of the antibodies used for IHC

|        | firm              | clone | dilution     | unmasking |
|--------|-------------------|-------|--------------|-----------|
| CD80   | RD System         |       | 1:100        | pH 6      |
| CD4    | Dako              | 4B12  | Ready to use | pH 9      |
| CD8    | Thermo Scientific | sp16  | 1:50         | pH 9      |
| T-bet  | Santa Cruz        | H-210 | 1:50         | pH 9      |
| Fox-P3 | Abcam             |       | 1:100        | pH 9      |
| MLH1   | Dako              | ES05  | READY TO USE | pH 9      |
| MSH2   | Thermo Scientific | 25D12 | READY TO USE | pH 9      |
| MSH2   | Dako              | FE11  | READY TO USE | pH 9      |
| MSH6   | Dako              | EP49  | 1:50         | pH 9      |
| MSH6   | Dako              | EP51  | 1:50         | pH 9      |
